# Supplementary material
Source: publisher site journal article supplement (https://vdj.pensoft.net/article/download/suppl/5357707/)
Supplement: Supplementary file 1

## Sheet: Sheet1
MEASUREMENTS
	Grape weight (g)	Grape width (cm)	Berry length (mm) (avg of 10 berries)	Berry width (mm) (avg of 10 berries)	Weight of 30 berries (g)	pH	Total Acidity	Sugars	Total phenolics seeds (mg gallic acid/g fresh tissue)	Total phenolics skins (mg gallic acid/g fresh tissue)	skins total flavanols (mg catechin/g fresh tissue)	seeds total flavanols (mg catechin/g fresh tissue)	skins total flavononoids (mg catechin/g fresh tissue)	seeds total flavononoids (mg catechin/g fresh tissue)	skins total flavones and flavonols (mg rutin/ g fresh tissue)	seeds total flavones and flavonols (mg rutin/ g fresh tissue)	total tannins skins (mg catechin/g fresh tissue)	total tannins seeds (mg catechin/g fresh tissue)	Acid must (μg tartaric acid/mg must)	Acid must (μg malic acid/mg must)	Acid must (μg ascorbic acid/mg must)	Acid must μg succinic acid/mg must	Acid must (μg fumaric acid/mg must)	total anthocyanins (mg malvidin/g fresh tissue)	mg delfinidin/g fresh tissue	mg cyanidin/g fresh tissue	mg petunidin/g fresh tissue	mg peonidin/g fresh tissue	mg malvidin/g fresh tissue	mg acetic ester malvidin/ g fresh tissue	mg coumaric ester malvidin/ g fresh tissue
Β01	180.66	9.85	14.627	10.977	53.72	4.18	3.55	24.41	26.4675	7.565	2.114	23.694	14.53	105.465	0.765	0.267	22.9364	72.6955	4935.6	1196.88	39.878	3.29263	66.1009	3.959	0.0349669	0.0273404	0.0648111	0.0955457	0.935063	0.0526073	0.00838412
Β01	191	9	13.563	11.563	54	4.05	3.6	22.2	28.455	7.24	2.452	25.26	15.74	104.16	0.681	0.3255	15.5727	76.2182	5226.18	1182.93	35.072	3.7229	61.2875	3.982	0.0368564	0.0278085	0.0676803	0.10427	0.882135	0.046883	0.00668348
Β01	175	9.5	14.05	11.69	55	4.01	3.5	23.2	26.8275	6.885	2.664	23.676	15.12	106.995	0.684	0.3675	18.4909	84.7864	5207.66	1114.53	37.88	3.48447	59.2416	3.759	0.0361767	0.0288511	0.0715086	0.106184	0.864802	0.0505097	0.0089324
Β02	179.78	9.76	14.497	12.007	59.72	3.77	3.4	23.61	27.3975	6.825	2.204	33.324	14.77	105.465	0.724	0.3275	18.7818	76.6955	4935.6	1196.88	39.878	3.29263	66.1009	3.959	0.0349669	0.0273404	0.0648111	0.0955457	0.935063	0.0526073	0.00838412
Β02	171	9	14.563	12.563	54	3.85	3.8	24.2	28.455	7.14	2.452	31.26	14.74	104.16	0.721	0.3255	19.7273	76.2182	5226.18	1182.93	35.072	3.7229	61.2875	3.982	0.0368564	0.0278085	0.0676803	0.10427	0.882135	0.046883	0.00668348
Β02	175	9.5	14.05	12.69	55	3.81	3.6	23.2	26.8275	6.885	2.664	32.676	13.12	106.995	0.685	0.307	18.4909	80.7864	5207.66	1114.53	37.88	3.48447	59.2416	3.759	0.0361767	0.0288511	0.0715086	0.106184	0.864802	0.0505097	0.0089324
Β03	177	8.5	15.085	13.173	49	4.09	3.75	25.2	25.2	7.2	2.24	30.8933	15.93	109.83	0.687	0.4095	16.2818	93.3545	5389.15	1280.82	32.476	3.60368	60.2646	3.936	0.0390166	0.0268298	0.0533368	0.110227	0.873468	0.0577951	0.00767704
Β03	151	9	12.563	12.563	44	4.13	3.75	25.2	28.455	6.84	2.452	29.26	16.74	104.16	0.681	0.3255	15.5727	96.2182	5426.18	1082.93	35.072	3.7229	61.2875	3.582	0.0368564	0.0248085	0.0576803	0.10427	0.882135	0.046883	0.00468348
Β03	155	7.5	14.05	12.69	55	4.1	3.75	25.2	26.8275	6.885	2.664	32.676	15.12	106.995	0.684	0.3675	18.4909	94.7864	5407.66	1014.53	29.88	3.48447	59.2416	3.759	0.0411767	0.0288511	0.0555086	0.116184	0.864802	0.0405097	0.0089324
Β04	132	8.5	15.607	14.727	65	3.89	3.75	22	25.305	5.805	2.972	28.8773	13.59	108.15	0.8085	0.308	25.0091	112.636	4440	1308.78	44.4098	3.99115	57.6543	4.152	0.0319244	0.0248085	0.0522626	0.100065	0.784096	0.0229587	0.00622854
Β04	137	7	15.104	14.208	57	3.89	3.375	22	26.67	6.435	2.836	33.0027	15.3	113.19	0.828	0.378	22.7727	110.918	4280.66	1296.69	44.0403	3.84574	67.9189	4.566	0.0365888	0.0248936	0.0595485	0.105302	0.778085	0.0203755	0.00830472
Β04	157	8	15.246	13.579	67	3.89	3.375	22	25.9875	6.525	2.7	30.6133	14.445	118.23	0.81825	0.385	27.2455	115.5	4599.35	1320.87	44.7793	4.13656	62.7866	4.359	0.0362065	0.0232766	0.0592683	0.109546	0.790107	0.0255418	0.00545601
Β05	107	6	14.048	12.359	53	4.09	3.75	23.4	28.77	6.345	2.536	28.7	11.61	108.36	0.6555	0.4095	25.0295	109.391	7164.58	1733	37.9223	4.45087	90.6261	2.988	0.0368182	0.0224681	0.0567929	0.0967554	0.670679	0.0295011	0.0145333
Β05	117	6	15.024	14.248	55	4.09	3.75	23.4	26.145	6.75	2.456	28.6533	11.16	110.67	0.6585	0.3395	24.3818	103.855	6315.33	1821.34	32.9319	4.46712	80.582	3.084	0.0327273	0.0194894	0.0526362	0.0867878	0.679152	0.0316738	0.0194099
Β05	107	6	14.642	13.518	57	4.09	3.75	23.4	27.4575	7.02	2.616	29.988	12.06	109.515	0.6705	0.3745	25.6773	106.623	6739.96	1777.17	42.9127	4.10405	100.67	3.24	0.0324979	0.0185957	0.0522159	0.0886957	0.662205	0.0311427	0.0169716
Ε01	172	8	15.386	14.523	64	4.27	4.5	17.8	27.3	7.38	4.006	28.6907	13.77	119.49	1.08975	0.294	33.0955	94.6909	5940.8	1265.82	18.6948	4.12753	47.7249	6.804	0.0329184	0.0194468	0.0528697	0.0858144	0.675145	0.0326878	0.119549
Ε01	153	9	14.196	13.226	60	4.27	4.5	18	32.34	7.605	4.052	32.4053	15.03	116.55	1.065	0.3115	33.7091	108.436	5777.36	1234.73	18.5221	4.47977	46.8342	7.362	0.0331478	0.0175745	0.0559056	0.0829916	0.953691	0.0457725	0.0686105
Ε01	146	7	14.913	13.64	58	4.27	4.5	17.8	26.46	7.605	3.96	30.548	14.4	118.02	1.1145	0.2765	32.4818	97.1727	6146.33	1203.63	18.3493	3.77529	45.9436	7.65	0.0311597	0.0185106	0.0562325	0.0746204	0.814418	0.0392302	0.170488
Ε02	178	10	11.956	11.352	60	3.82	3.75	19	26.04	9.72	4.796	26.712	12.735	90.51	1.0965	0.3675	24.4364	92.0182	5985.63	1862.65	29.4722	4.49783	90.0265	5.46	0.021028	0.0056383	0.033534	0.0289877	0.500021	0.025059	0.159455
Ε02	166	8.5	12.736	11.515	62	3.83	3.375	18.9	24.57	8.82	5.076	31.9573	13.41	93.555	0.8985	0.4025	25.0364	108.245	6370.15	2240.46	34.4962	4.64053	90.0529	5.91	0.015102	0.00604255	0.0245667	0.0300584	0.430445	0.0258315	0.161701
Ε02	168	8	11.707	11.767	67	3.85	3	19	23.1	9.225	4.516	25.704	12.06	96.6	1.0785	0.41475	24.7364	86.6727	6237.84	2287.18	34.3042	4.35513	90	5.685	0.0145667	0.00523404	0.0251738	0.0279169	0.437881	0.025735	0.15721
Ε03	146	8	16.054	14.614	63	4.27	4.125	21.8	26.355	9.045	3.34	25.368	8.46	110.355	0.7815	0.329	17.0182	97.9364	5187.53	851.578	24.8656	3.22616	42.716	5.076	0.0458411	0.0264468	0.0612299	0.0921804	0.964168	0.058978	0.577613
Ε03	143	8	15.687	14.281	59	4.28	4.5	21.8	26.5125	9.09	3.244	29.792	7.2	110.88	0.7905	0.371	18.15	95.2636	5132.52	779.017	24.261	2.77818	40.776	4.98	0.0435089	0.026383	0.0647327	0.110675	1.01694	0.0509871	0.485585
Ε03	173	9	14.105	13.029	59	4.28	4.5	21.8	26.67	9.315	3.668	28.2053	9.18	109.83	0.786	0.35	19.2818	102.327	5160.03	761.662	25	3.00217	41.746	5.358	0.0481733	0.0265106	0.0757551	0.117683	1.20481	0.0669689	0.669641
Ε04	209	9	14.611	13.807	68	3.87	3.375	18.2	29.925	5.805	2.74	31.192	5.76	122.43	0.77025	0.2905	18.7909	86.1	4816.26	841.801	23.714	3.19093	47.7337	4.206	0.0664868	0.029617	0.0785106	0.121402	1.07797	0.0499732	0.574957
Ε04	179	7.5	14.349	13.511	58	3.87	3.375	18.2	25.515	5.85	2.616	29.7733	5.355	120.96	0.738	0.3185	17.3455	85.7182	5046.08	824.093	25.2111	3.28035	44.6384	4.254	0.0627018	0.0320426	0.0887857	0.132771	1.14504	0.0513734	0.539131
Ε04	181	7.5	13.181	12.308	59	3.88	3.375	18.2	27.72	5.85	2.678	29.792	4.95	121.695	0.8025	0.2625	20.2364	86.4818	5351.46	859.51	24.4194	3.10152	50.8289	5.31	0.0702719	0.0365957	0.0836482	0.127086	1.11834	0.0557189	0.610783
Ε05	117	7	14.711	13.654	51	3.91	3.375	20	29.925	6.075	2.656	30.5387	11.43	114.24	0.8055	0.41475	17.1	103.473	6018.72	1754.75	34.0547	4.32803	87.1605	5.022	0.0604078	0.0254894	0.0874312	0.0949156	1.09569	0.0494903	0.150378
Ε05	111	6	14.306	12.04	56	3.91	3.375	20	27.51	6.165	2.344	33.6	11.25	111.09	0.8355	0.4095	15.6	99.8455	6069.87	1680.38	32.7975	3.91167	91.3051	4.959	0.0500467	0.0201277	0.0850026	0.0907592	1.00811	0.0464002	0.1153
Ε05	126	6.5	14.52	12.147	56	3.91	3.75	20	25.095	6.435	2.956	29.9787	11.07	107.94	0.8655	0.42	16.35	101.659	6342.38	1717.57	33.4261	3.4953	89.2328	4.896	0.0562787	0.0232766	0.0825739	0.099072	1.07464	0.050794	0.185456
Η01	203	9	17.721	16.91	103	3.73	5.25	22.2	22.995	4.5	3.9	31.3973	13.68	114.66	0.984	0.4235	16.1182	96.2182	6553.36	1240.07	26.6459	3.43569	46.7019	6.132	0.0469881	0.0197021	0.0729061	0.0902531	1.05687	0.0622371	0.224517
Η01	224	8	16.392	14.401	84	3.73	5.25	22.4	25.2	4.635	4.03	32.004	13.68	118.65	0.9825	0.441	16.2955	91.4455	6363.03	1234.88	28.7092	3.40499	49.612	6.09	0.0454014	0.0198936	0.0705475	0.0937768	0.897344	0.0532082	0.197285
Η01	209	8	15.801	14.36	80	3.73	4.875	22.2	25.725	4.59	4.16	30.2027	13.68	117.81	0.981	0.4585	16.4727	93.1636	6172.7	1237.47	27.6775	3.42034	53.7919	6.048	0.0438148	0.0200851	0.0681889	0.0973005	1.2164	0.0712661	0.210901
Η02	239	9.5	13.99	12.773	76	4.09	4.5	23.8	21.315	5.985	3.44	28.7467	9.99	98.28	0.72675	0.4865	13.5818	73.7864	5865.42	1500.47	16.7466	4.01734	91.358	4.416	0.038921	0.0230638	0.0600623	0.118209	1.00941	0.0568294	0.361014
Η02	119	9	13.971	13.629	79	4.09	4.125	23.8	22.785	5.985	3.422	33.208	8.01	106.89	0.7155	0.4585	15.4636	76.7455	6202.92	1629.89	16.5451	3.40679	93.0335	3.864	0.0393798	0.0285957	0.0586144	0.136528	0.916223	0.0491041	0.331368
Η02	112	7	14.539	13.104	76	4.08	3.75	24	24.255	5.49	3.404	33.0773	9.54	105	0.738	0.4725	14.1545	70.8273	6108.21	1618.03	16.9482	3.71207	89.6825	4.62	0.0383093	0.0288085	0.0567462	0.135944	0.86794	0.0449034	0.311765
Η03	186	9	15.492	14.262	63	4.07	4.5	21	32.025	5.445	2.838	29.456	16.56	102.9	0.9885	0.399	20.8636	77.3182	6494.47	1560.55	19.2658	4.47977	93.0511	6.984	0.0369329	0.014617	0.0588012	0.0771025	1.04881	0.0778326	0.622878
Η03	180	8.5	15.87	14.413	59	4.08	4.875	21	37.485	5.04	2.996	29.8107	12.15	107.1	0.9555	0.378	20.8636	78.2727	6844	1520.03	21.3196	4.53035	89.03	5.664	0.0385004	0.0161702	0.0645926	0.0823881	1.19907	0.075177	0.601078
Η03	206	9	15.533	14.008	60	4.09	4.5	21.2	31.605	5.22	2.68	30.352	13.05	110.67	1.0665	0.3815	20.8636	76.3636	6841.79	1476.21	23.6516	4.50506	90.1411	6.456	0.0389975	0.0130638	0.0663674	0.071817	1.27444	0.0804882	0.644678
Η04	182	9	13.907	12.512	49	3.88	5.25	17.4	38.64	6.255	4.486	32.508	18.045	100.17	1.047	0.462	23.5636	76.9364	6679.82	1456.57	23.714	4.03179	87.037	5.118	0.0349448	0.0140426	0.0578672	0.0712914	1.06706	0.070059	0.600113
Η04	182	10	12.939	12.26	45	3.89	4.875	17.6	39.48	6.48	4.248	34.6453	17.19	108.78	0.969	0.476	22.9636	77.3182	6421.21	1507.7	23.6948	4.73266	82.9101	6.306	0.0329949	0.0140851	0.0578672	0.0696366	1.06537	0.0766255	0.670703
Η04	193	9.5	13.267	12.15	46	3.89	4.875	17.4	37.8	7.2	4.724	30.3707	18.9	117.39	1.125	0.448	24.1636	77.7	6214.83	1520.89	20.8733	4.71279	84.9735	6.72	0.032842	0.0100426	0.0585677	0.0636016	1.125	0.0885515	0.762634
Η05	206	10	13.196	12.019	47	4.02	4.5	19.2	25.2	7.29	4.264	22.7547	24.84	105	1.146	0.441	18.9818	94.4045	6042.57	1362.69	40.5638	5.3703	84.8501	7.662	0.0324596	0.00889362	0.0680721	0.0452044	1.2459	0.103423	1.00563
Η05	179	8	13.141	11.754	45	4.02	4.5	19.2	29.505	7.155	4.612	26.0027	20.7	103.74	1.2645	0.504	18.9818	95.6455	5922.64	1392.49	38.9107	5.71893	82.6984	8.526	0.0386534	0.00889362	0.0687026	0.0433939	1.53536	0.133214	1.10545
Η05	181	10	12.859	11.176	43	4.01	4.875	19	30.135	7.245	4.788	25.4427	22.05	106.26	1.1505	0.455	18.9818	93.1636	5438.46	1332.89	42.2169	6.06756	76.6667	8.31	0.0373152	0.00770213	0.0674416	0.039072	1.55264	0.1378	0.905818
